# Supplementary material for: Optimizing the thermoelectric performance of In–Cd codoped SnTe by introducing Sn vacancies
Source: Royal Society of Chemistry journal article supplement (doi:10.1039/c7tc02162c), 2017-01-01
Supplement: c7tc02162c1.pdf [file c7tc02162c1.pdf]

## Supporting Information

### Optimizing the thermoelectric performance of In-Cd codoped SnTe by introducing Sn vacancy

Xiaofang Tan<sup>1,2</sup>, Xiaojian Tan<sup>1</sup>, Guoqiang Liu<sup>1,\*</sup>, Jingtao Xu<sup>1,†</sup>, Hezhu Shao<sup>1</sup>, Haoyang Hu<sup>1</sup>, Min Jin<sup>1</sup>, Haochuan Jiang<sup>1</sup>, Jun Jiang<sup>1,‡</sup>

<sup>1</sup> Ningbo Institute of Materials Technology and Engineering, Chinese Academy of Science, Ningbo 315201, China

<sup>2</sup> Nano Science and Technology Institute, University of Science and Technology of China, Suzhou 215123, China

#### Supporting Tables

Table S1. Densities of all samples investigated in this study.

| Compositions                                                  |           | Density( $\rho$ , g/cm <sup>3</sup> ) | Relative density (%) |
|---------------------------------------------------------------|-----------|---------------------------------------|----------------------|
| SnTe                                                          |           | 6.478                                 | 99.66                |
| Sn <sub>0.97-x</sub> In <sub>x</sub> Cd <sub>0.03</sub> Te    | $x=0$     | 6.478                                 | 99.66                |
|                                                               | $x=0.005$ | 6.449                                 | 99.22                |
|                                                               | $x=0.01$  | 6.489                                 | 99.83                |
|                                                               | $x=0.015$ | 6.419                                 | 98.75                |
| Sn <sub>0.96-z</sub> In <sub>0.01</sub> Cd <sub>0.03</sub> Te | $z=0.005$ | 6.477                                 | 99.65                |
|                                                               | $z=0.002$ | 6.440                                 | 99.08                |
|                                                               | $z=0$     | 6.489                                 | 99.83                |

\* E-mail: liugq@nimte.ac.cn

† E-mail: xujingtao@nimte.ac.cn

‡ E-mail: jjun@nimte.ac.cn

Table S2. The hole concentration  $n$ , mobility  $\mu$ , electrical conductivity  $\sigma$ , Seebeck coefficient  $S$ , and power factor  $S^2\sigma$  of  $\text{Sn}_{0.97-x}\text{In}_x\text{Cd}_{0.03}\text{Te}$  ( $x = 0, 0.005, 0.01, \text{ and } 0.015$ ) samples. at room temperature.

| Samples     | $n$<br>( $10^{20} \text{ cm}^{-3}$ ) | $\mu$<br>( $\text{cm}^2\text{V}^{-1}\text{s}^{-1}$ ) | $\sigma$<br>( $\text{Scm}^{-1}$ ) | $S$<br>( $\mu\text{VK}^{-1}$ ) | $S^2\sigma$<br>( $\mu\text{Wcm}^{-1}\text{K}^{-2}$ ) |
|-------------|--------------------------------------|------------------------------------------------------|-----------------------------------|--------------------------------|------------------------------------------------------|
| $x = 0$     | 1.4                                  | 142                                                  | 3331                              | 40                             | 5.4                                                  |
| $x = 0.005$ | 1.6                                  | 57.9                                                 | 1438                              | 72                             | 7.4                                                  |
| $x = 0.01$  | 2.0                                  | 32.2                                                 | 1160                              | 75                             | 6.3                                                  |
| $x = 0.015$ | 3.1                                  | 22.1                                                 | 1094                              | 83                             | 7.6                                                  |

## Supporting Figures

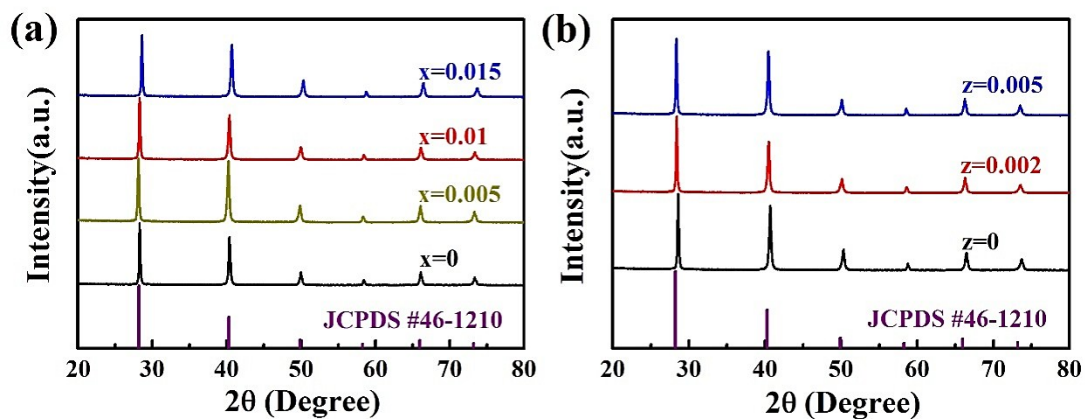

Figure S1. Powder XRD patterns for (a)  $\text{Sn}_{0.97-x}\text{In}_x\text{Cd}_{0.03}\text{Te}$  ( $x = 0, 0.005, 0.01, 0.015$ ) and (b)  $\text{Sn}_{0.96-z}\text{In}_{0.01}\text{Cd}_{0.03}\text{Te}$  ( $z = 0, 0.002, 0.005$ ). No second phase can be observed within the detection limit.

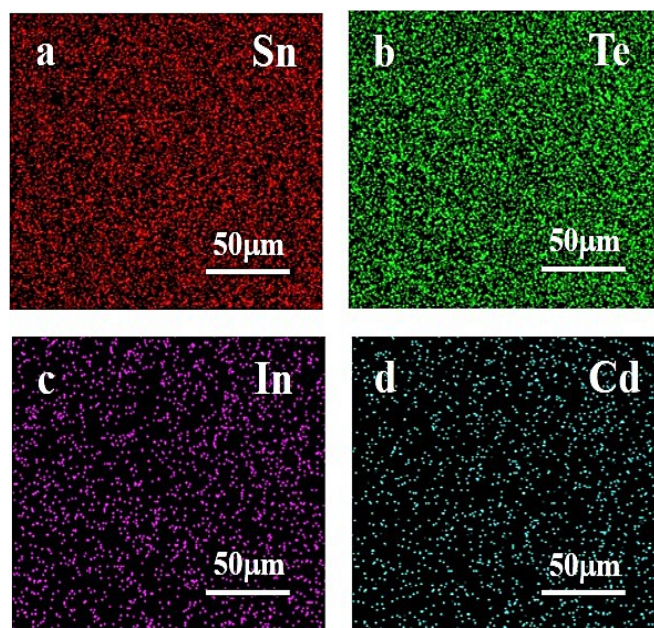

Figure S2. (a)-(d) the EDS mapping for Sn, Te, In and Cd in  $\text{Sn}_{0.958}\text{In}_{0.01}\text{Cd}_{0.03}\text{Te}$  sample, respectively.

Elements of Sn, Te, In and Cd are all uniformly distributed suggest a homogenous doping of In and Cd.
